# Supplementary material for: A cocrystal strategy for the precipitation of liquid 2,3-dimethyl pyrazine with hydroxyl substituted benzoic acid and a Hirshfeld surfaces analysis of them
Source: Royal Society of Chemistry journal article supplement (doi:10.1039/c2ce25767j), 2012-01-01
Supplement: c2ce25767j.pdf [file c2ce25767j.pdf]

## Supporting Information

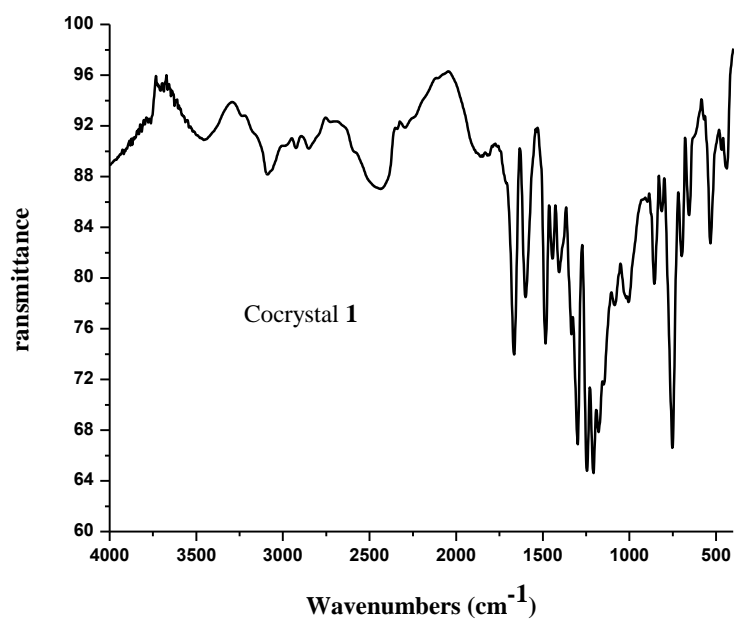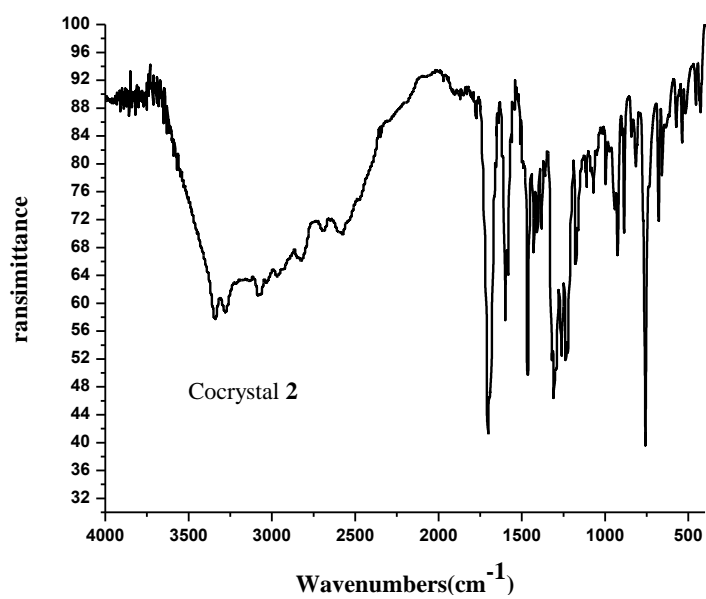

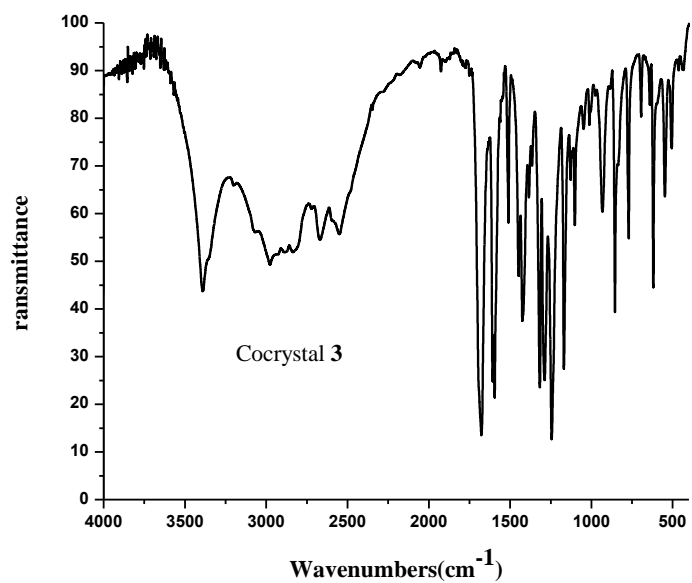

Fig. S1 Infrared spectra of cocrytals 1-3.

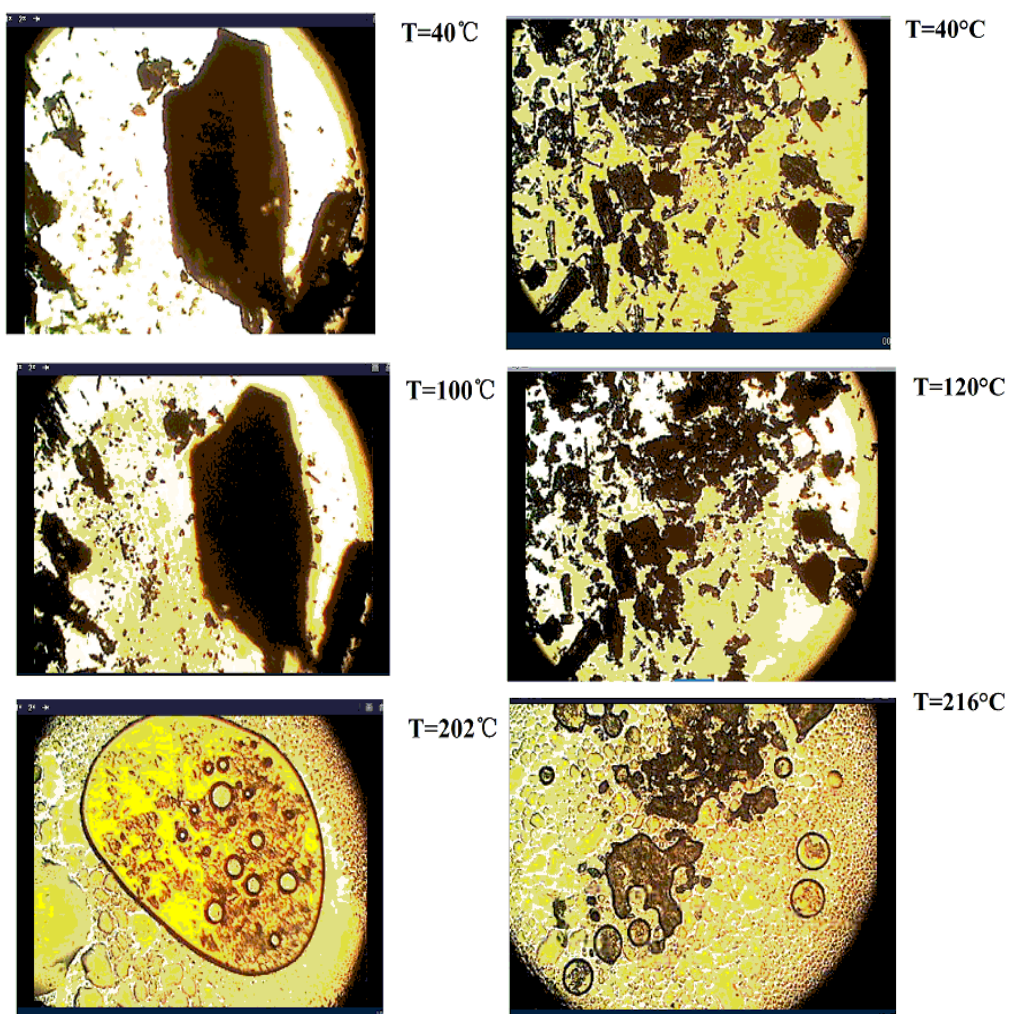

Fig. S2 Hot stage microscopy for cocrytals 2 (left) and 3 (right).
